# Supplementary material for: Ultrafine nickel nanocatalyst-engineering of an organic layered double hydroxide towards a super-efficient fire-safe epoxy resin via interfacial catalysis
Source: Royal Society of Chemistry journal article supplement (doi:10.1039/c8ta00910d), 2018-01-01
Supplement: c8ta00910d1.pdf [file c8ta00910d1.pdf]

# **Ultrafine Nickel Nanocatalyst-engineering Organic Layered Double Hydroxide towards Super-efficiently Fire-safe Epoxy Resin via Interfacial Catalysis**

Zhi Li<sup>a,b</sup>, Junhao Zhang<sup>a,c</sup>, François Dufosse<sup>a</sup>, De-Yi Wang<sup>a,b\*</sup>

<sup>a</sup> *IMDEA Materials Institute, C/Eric Kandel, 2, 28906 Getafe, Madrid, Spain*

<sup>b</sup> *Universidad Politécnica de Madrid, E.T.S. de Ingenieros de Caminos, 28040 Madrid, Spain*

<sup>c</sup> *School of Environmental and Chemical Engineering, Jiangsu University of Science and Technology,*

*Zhenjiang 212018, China*

\*Corresponding author. Tel: +34 917871888

Email address: [deyi.wang@imdea.org](mailto:deyi.wang@imdea.org)

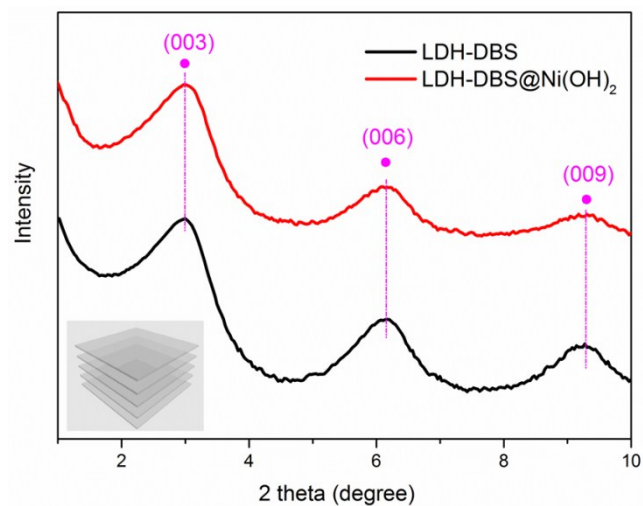

**Fig S1** XRD spectra of LDH-DBS and LDH-DBS@Ni(OH)<sub>2</sub> at small angle

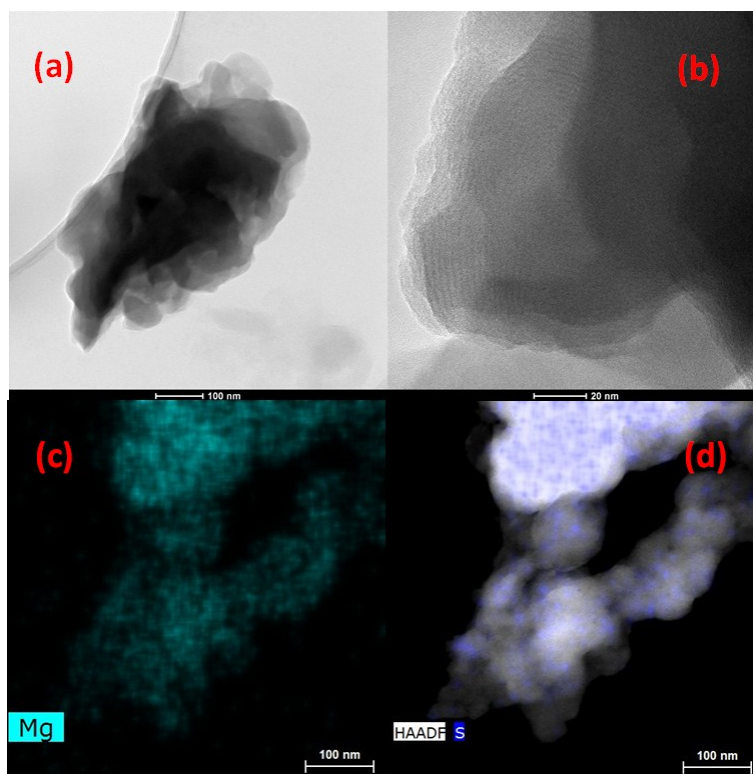

**Fig S2** (a) and (b) TEM images of LDH-DBS at different magnification; (c) Mg mapping of LDH-DBS and (d) HAADF image with S mapping of LDH-DBS

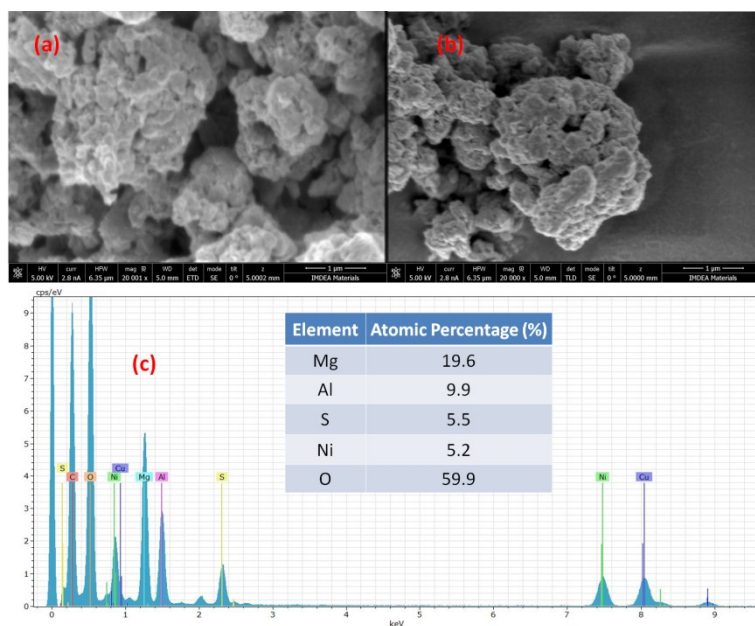

**Fig S3** (a) and (b) SEM images of LDH-DBS and LDH-DBS@Ni(OH)<sub>2</sub>; (c) EDS spectra with inset element percentage

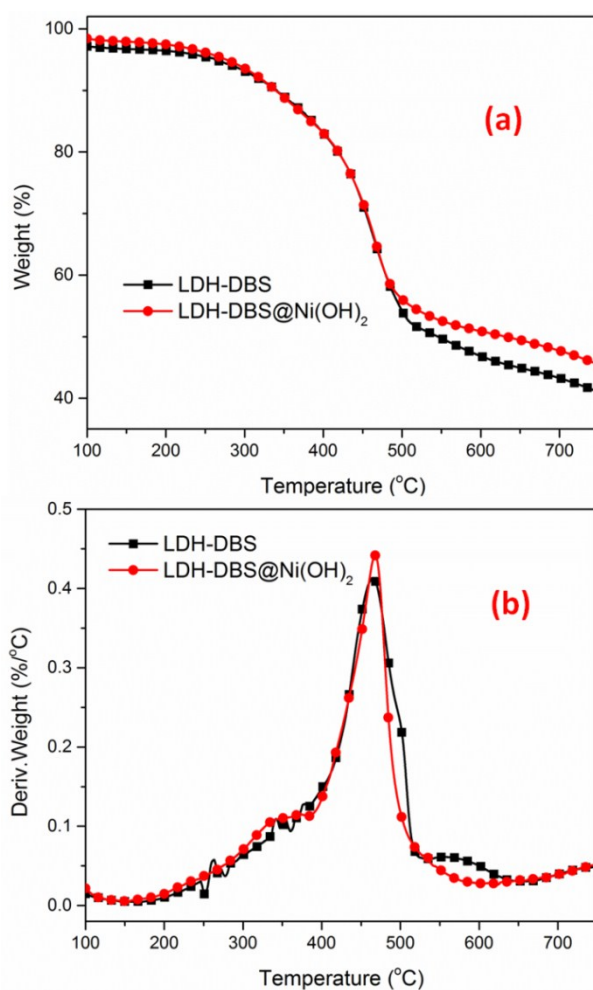

**Fig S4** (a) TG and (b) DTG curves of LDH-DBS and LDH-DBS@Ni(OH)<sub>2</sub>

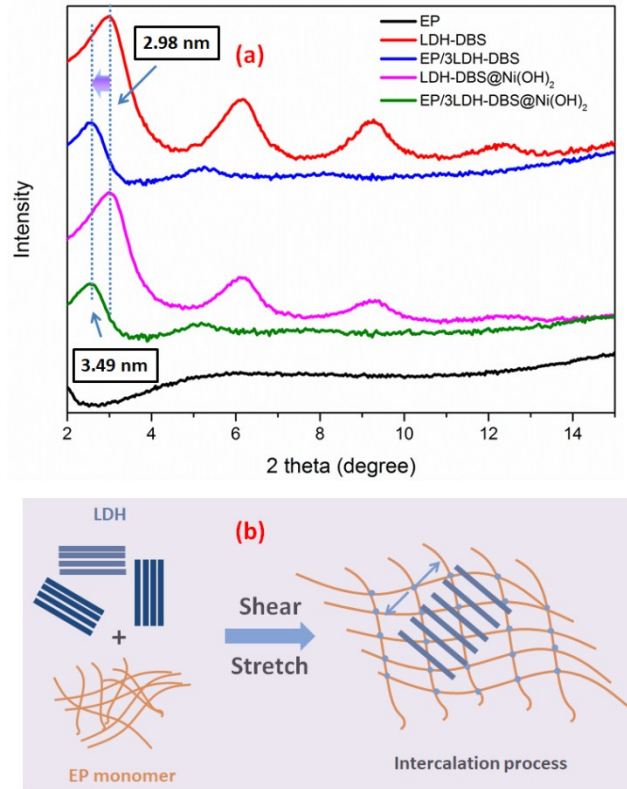

**Fig S5** (a) XRD patterns of EP and EP nanocomposites; (b) schematic illustration of intercalation process

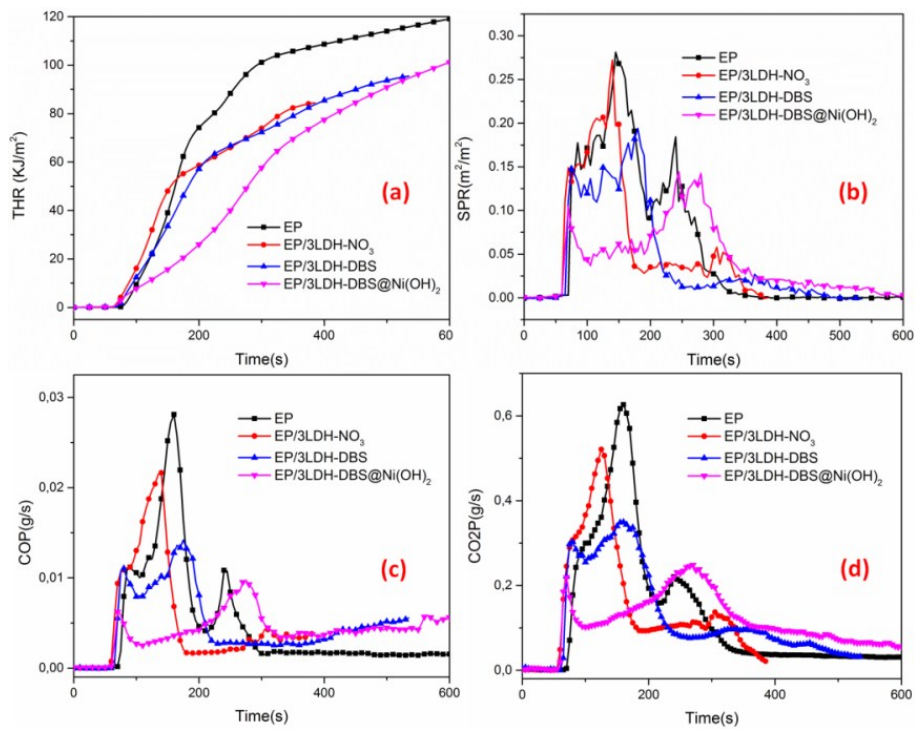

**Fig S6** (a) THR; (b) SPR; (c) COP and (d) CO<sub>2</sub>P profile of EP, EP/3LDH-NO<sub>3</sub>, EP/3LDH-DBS and EP/3LDH-DBS@Ni(OH)<sub>2</sub>

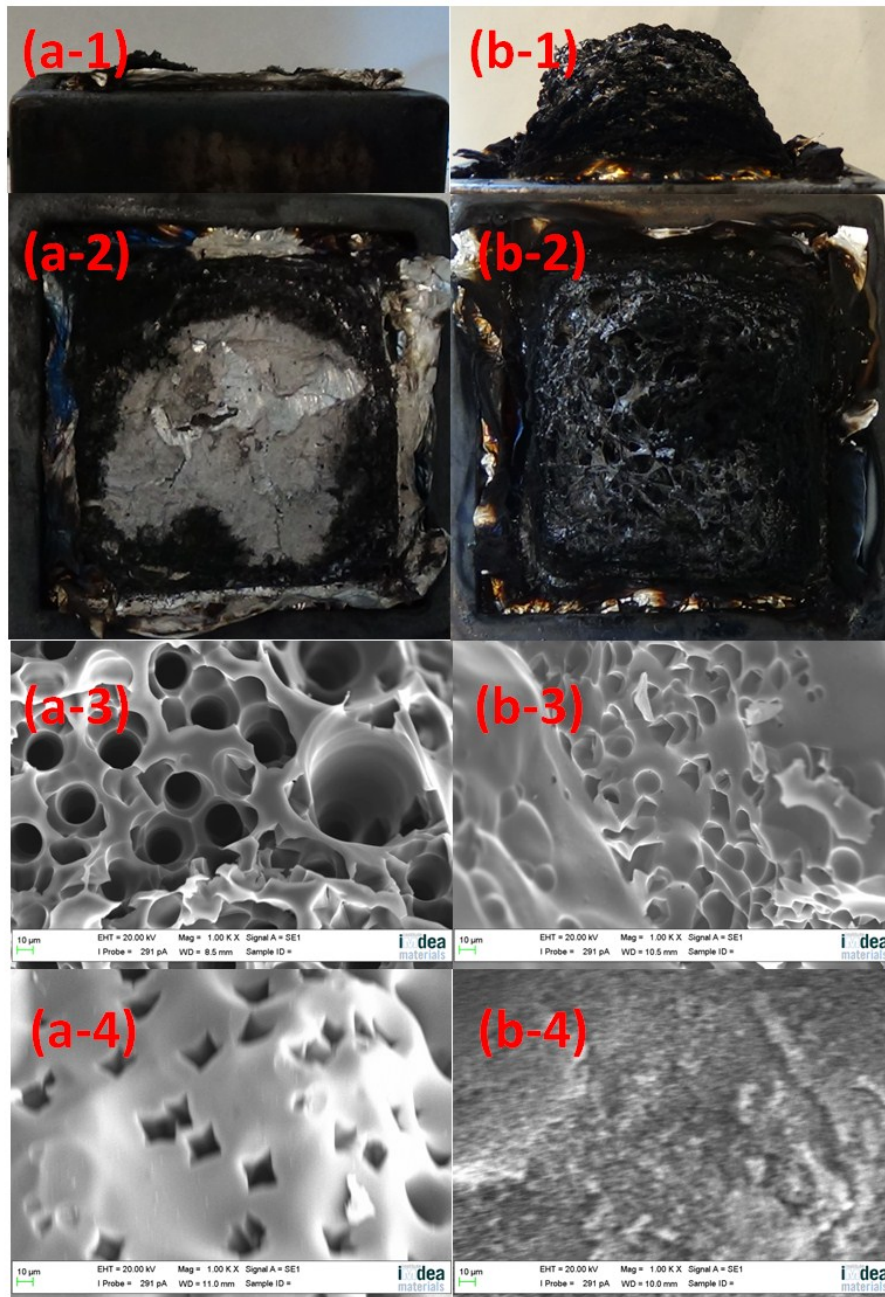

**Fig S7** (a-1) front view and (a-2) top view of EP; (b-1) front view and (b-2) top view of EP/3LDH-NO<sub>3</sub>; SEM images of (a-3) interior surface and (a-4) exterior surface of EP; SEM images of (b-3) interior surface and (b-4) exterior surface of EP/3LDH-NO<sub>3</sub>

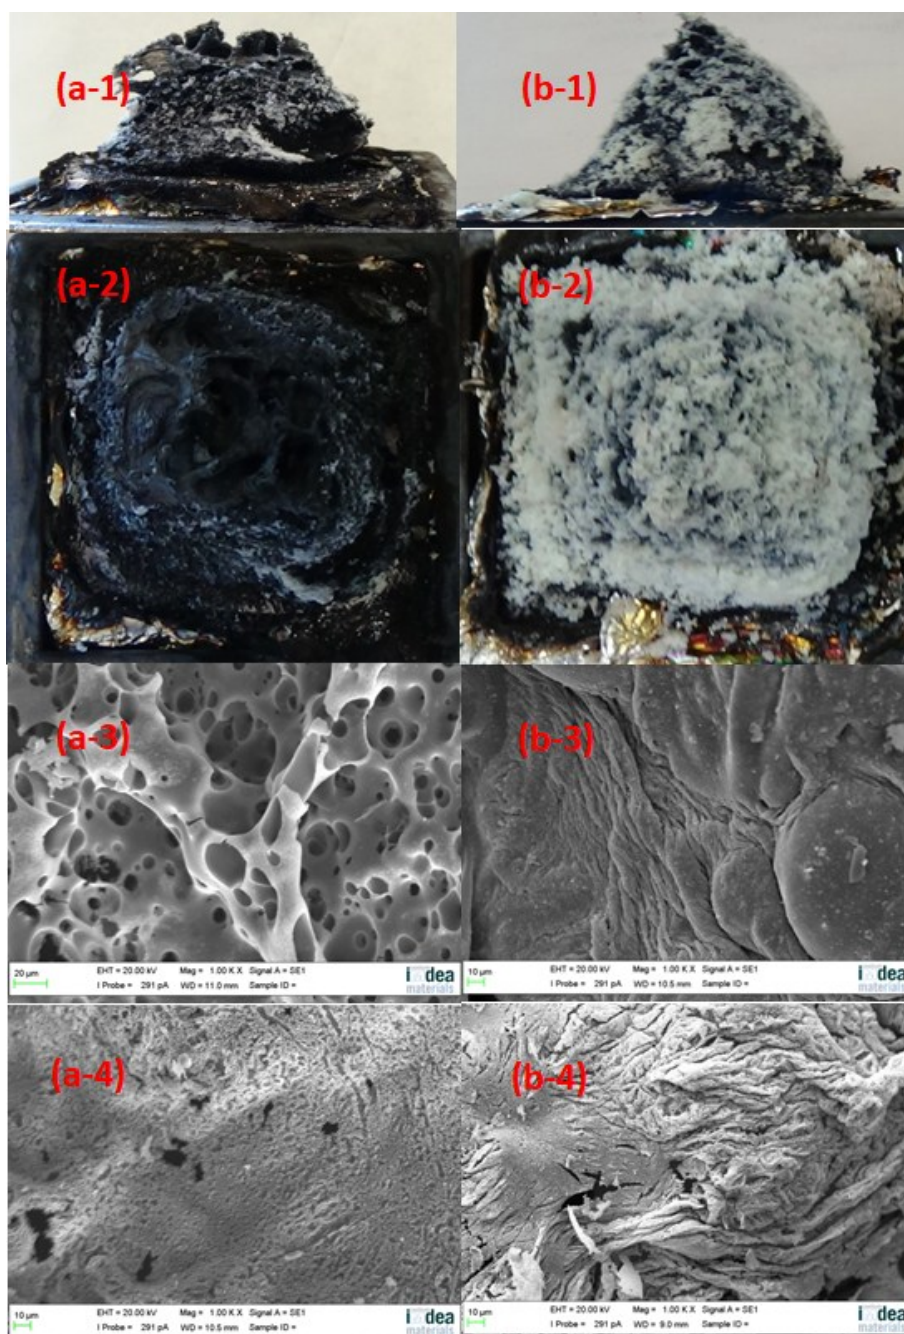

**Fig S8** (a-1) front view and (a-2) top view of EP/3LDH-DBS; (b-1) front view and (b-2) top view of EP/3LDH-DBS@Ni(OH)<sub>2</sub>; SEM images of (a-3) interior surface and (a-4) exterior surface of EP/3LDH-DBS; SEM images of (b-3) interior surface and (b-4) exterior surface of EP/3LDH-DBS@Ni(OH)<sub>2</sub>

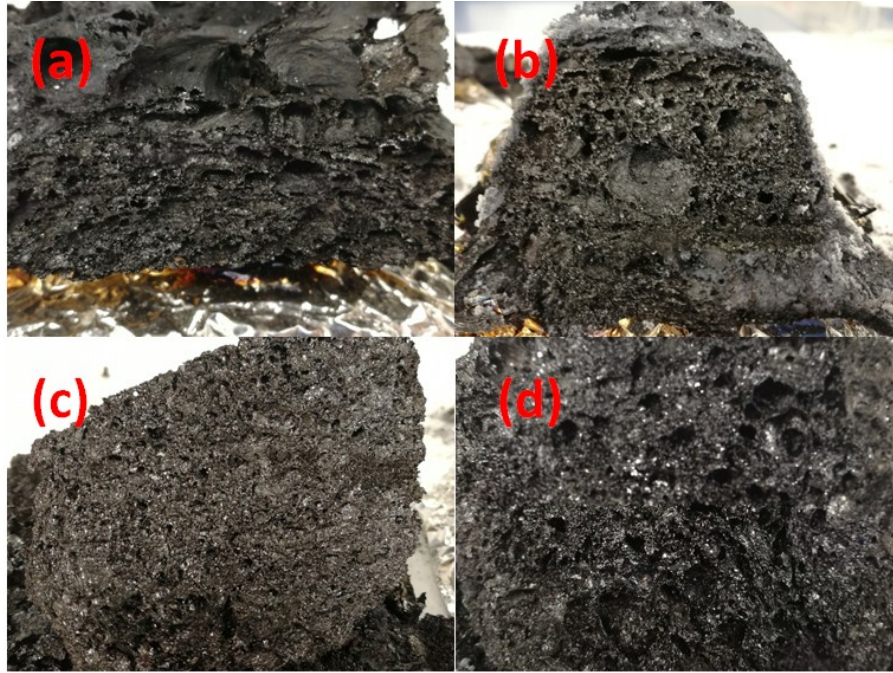

**Fig S9** Vertical section of char from (a) EP/3LDH-DBS and (b) EP/3LDH-DBS@Ni(OH)<sub>2</sub>; transverse section of char from (c) EP/3LDH-DBS and (d) EP/3LDH-DBS@Ni(OH)<sub>2</sub>

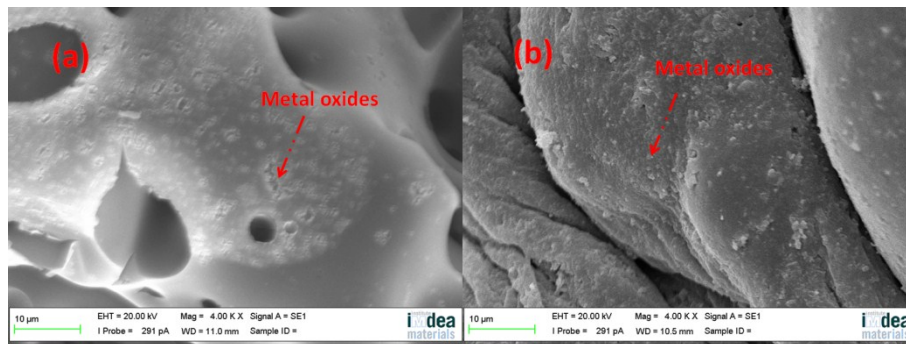

**Fig S10** High-magnification SEM image of interior char from (a) EP/LDH-DBS and (b) EP/3LDH-DBS@Ni(OH)<sub>2</sub>

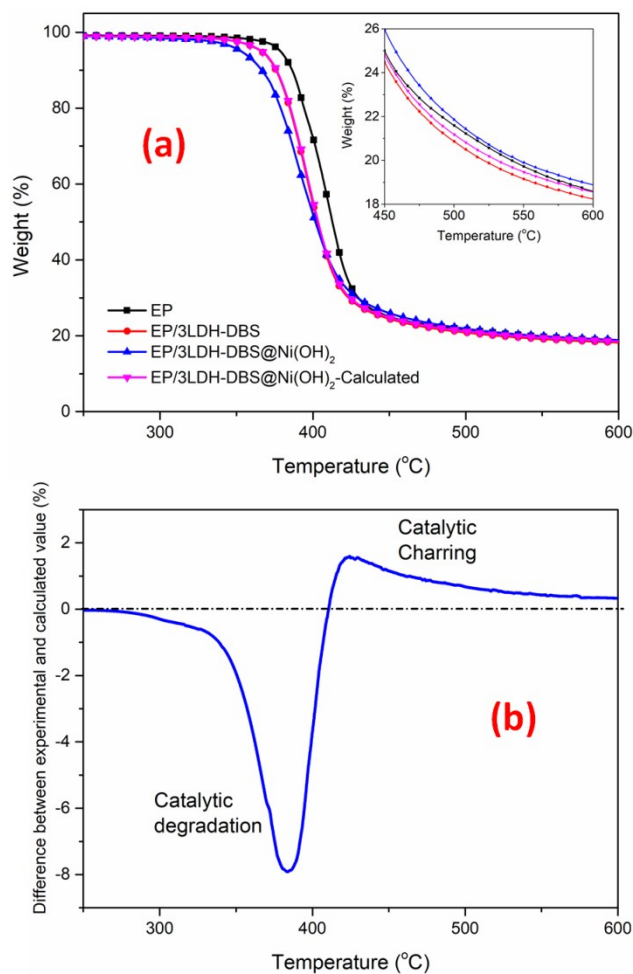

**Fig S11** (a) TG curves of EP, EP/3LDH-DBS, EP/3LDH-DBS@Ni(OH)<sub>2</sub> and calculated EP/3LDH-DBS@Ni(OH)<sub>2</sub>; (b) difference between experimental and calculated value

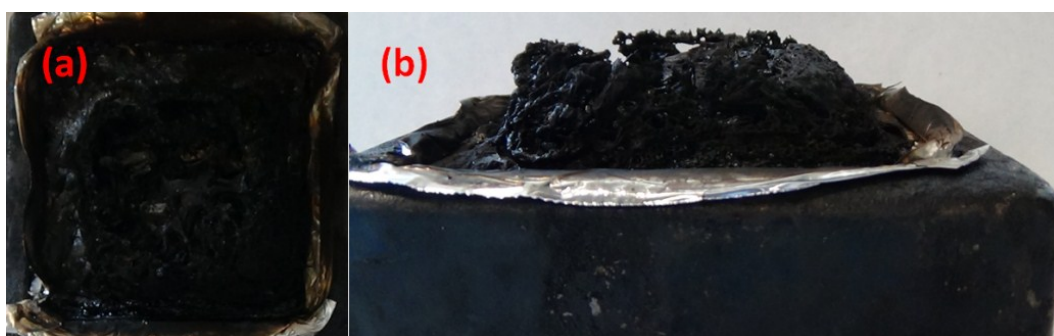

**Fig S12** (a) top view and (b) front view of char from neat EP after CCT at 157s



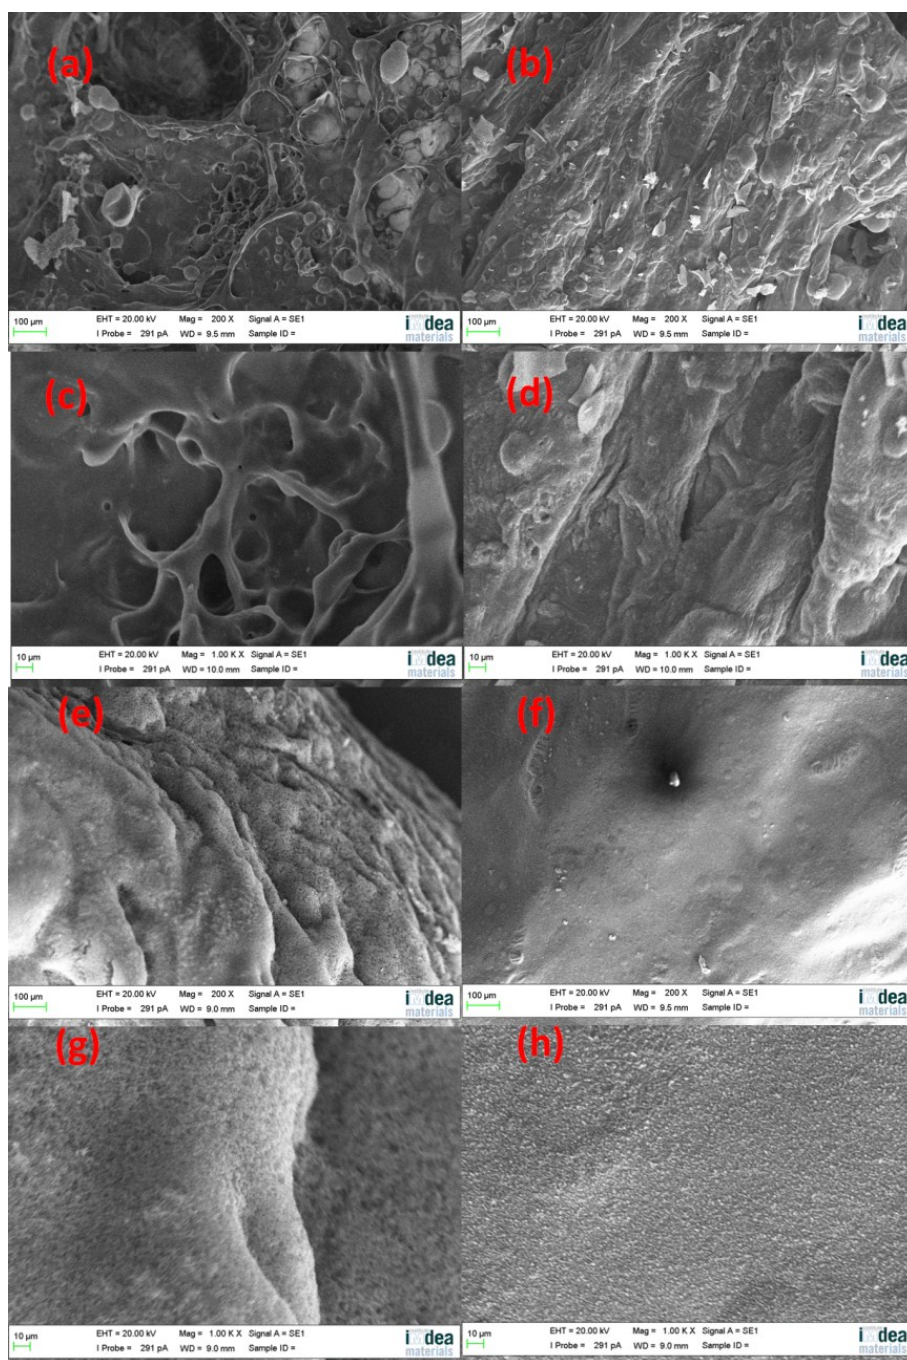

**Fig S13** SEM images of interior surface of char from (a), (c) EP/3LDH-DBS and (b) (d) EP/3LDH-DBS@Ni(OH)<sub>2</sub>; exterior surface of char from (e), (g) EP/3LDH-DBS and (f) (h) EP/3LDH-DBS@Ni(OH)<sub>2</sub>

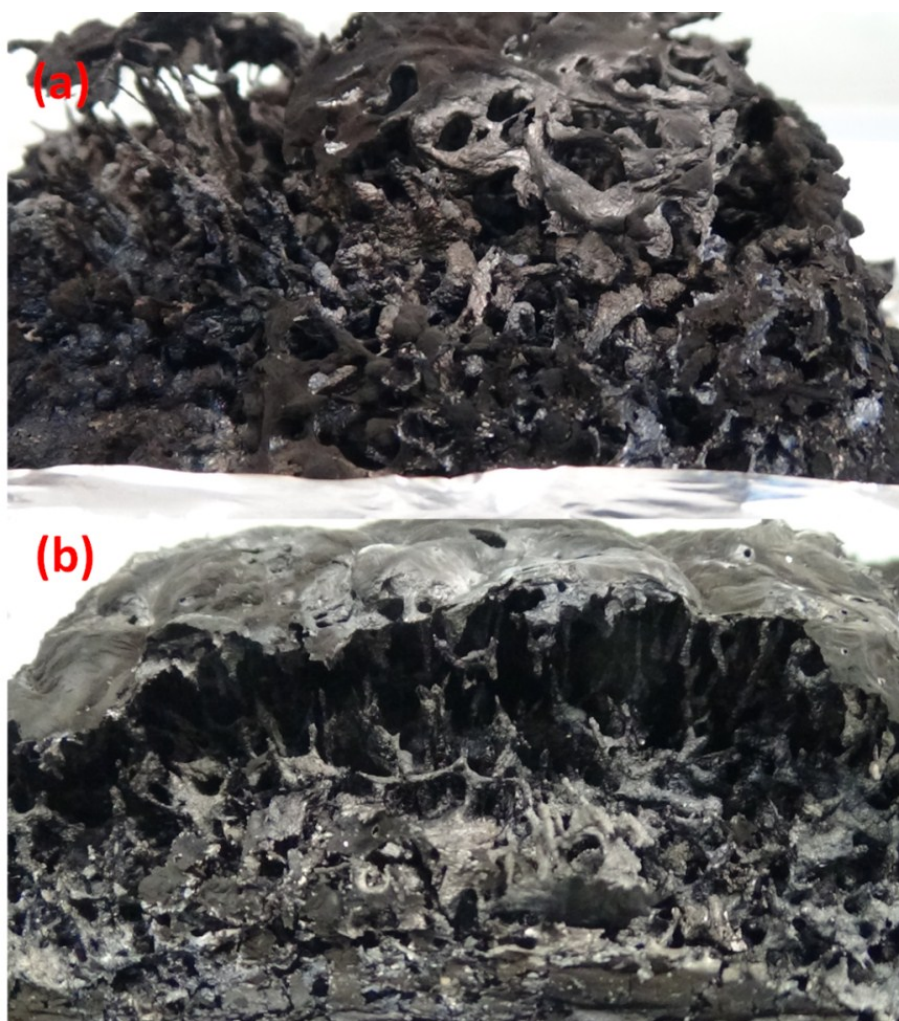

**Fig S14** Digital images of vertical section of char in CCT at 157s of (a) EP/3LDH-DBS and EP/3LDH-DBS@Ni(OH)<sub>2</sub>

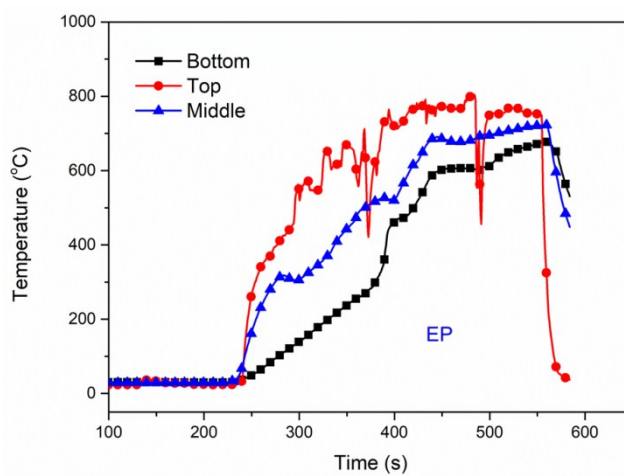

**Fig S15** Top, middle and bottom temperatures of EP at CCT

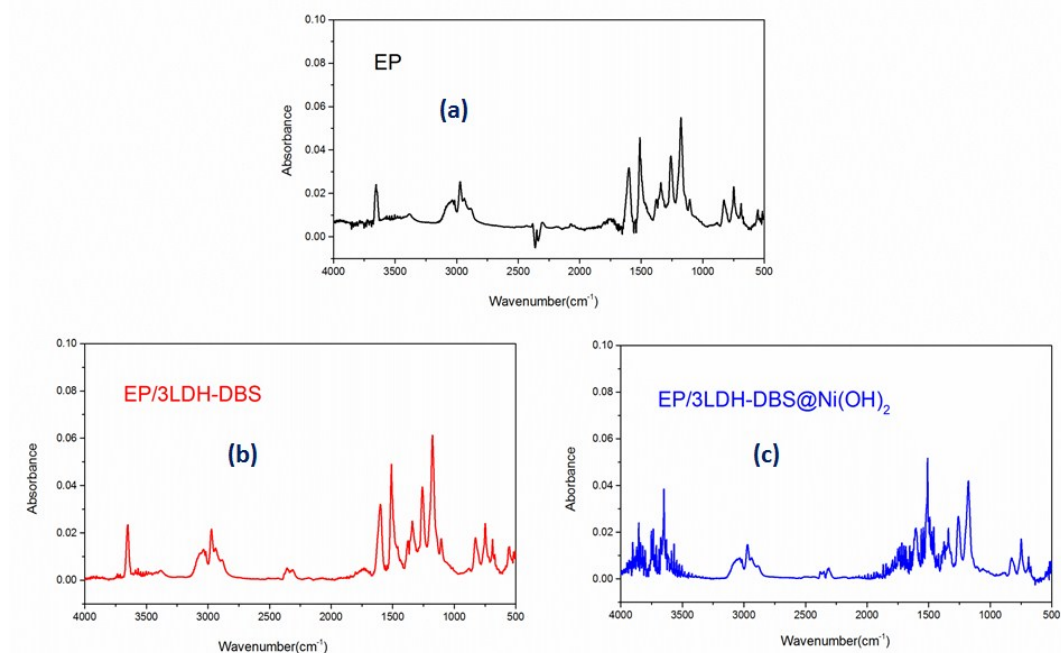

**Fig S16** FTIR spectra of evolved volatiles at the maximum degradation rate of (a) EP, (b) EP/3LDH-DBS and (c) EP/3LDH-DBS@Ni(OH)<sub>2</sub>

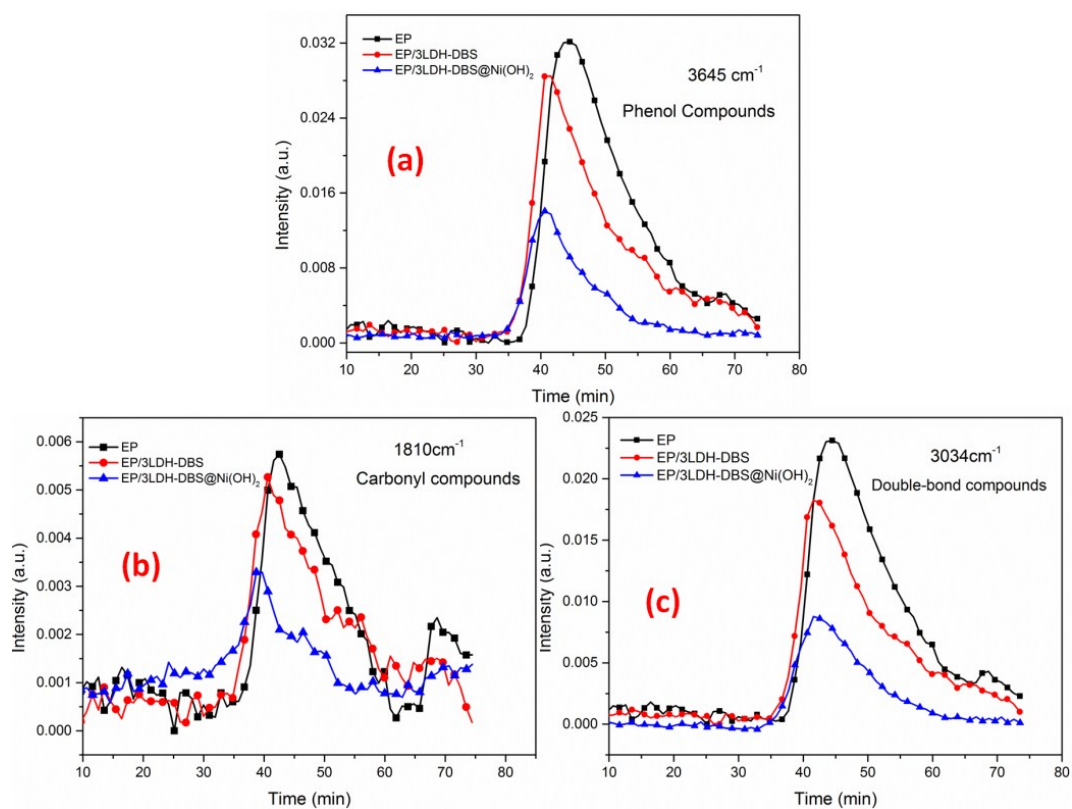

**Fig S17** Evolution of (a) phenol compounds, (b) carbonyl compounds, (c) double-bond compounds

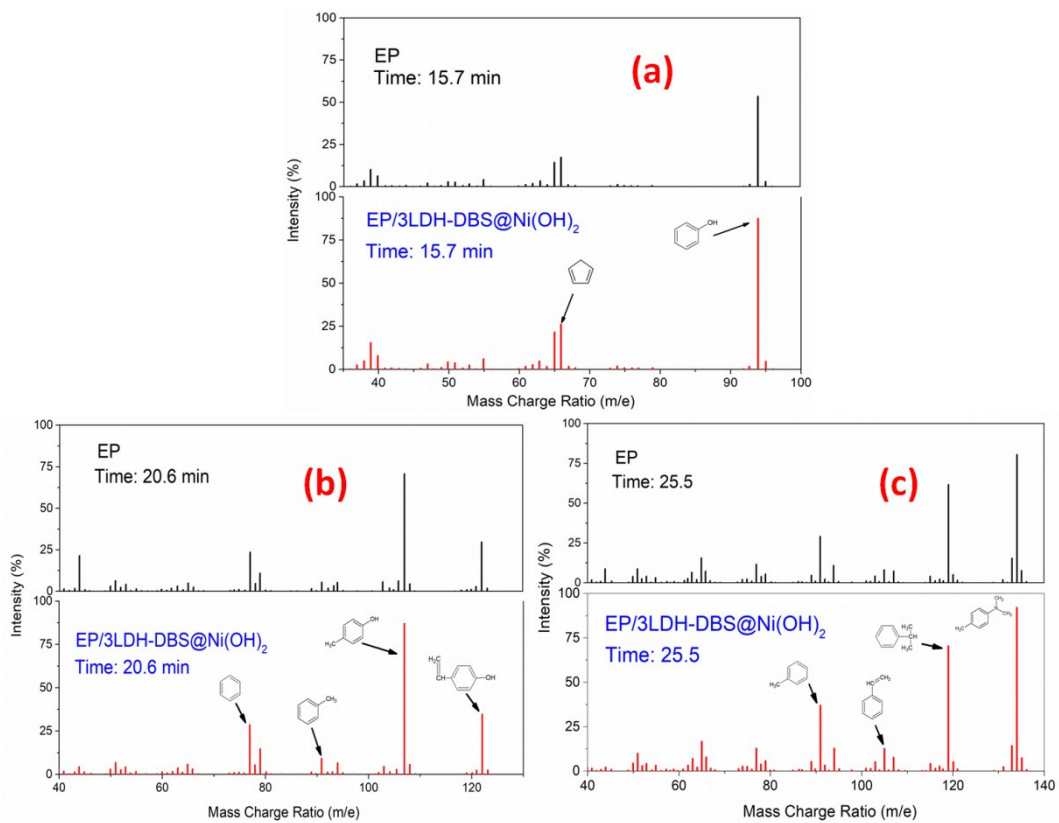

**Fig S18** MS results of EP and EP/3LDH-DBS@Ni(OH)<sub>2</sub> at 15.7min

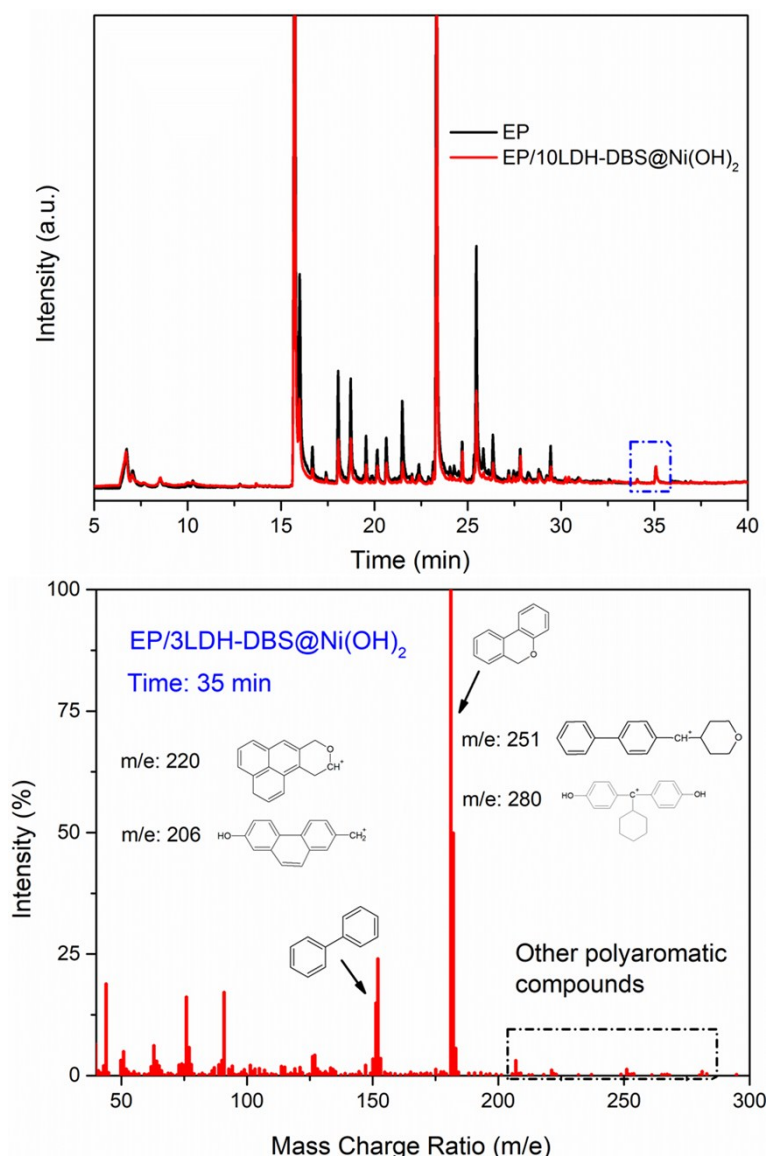

**Fig S19** (a) GC results of EP and EP/10LDH-DBS@Ni(OH)<sub>2</sub>; (b) MS results at 35min of EP/10LDH-DBS@Ni(OH)<sub>2</sub>
